# Supplementary material for: Extrastriatal spreading of microglial activation in Parkinson’s disease: a positron emission tomography study
Source: Springer Nature journal article supplement (doi:10.1007/s12149-016-1099-2), 2016-06-14
Supplement: MOESM2 [file 10253688]

**Supplementary Material and Methods**

We divided the Parkinson’s disease (PD) patients into two groups: PD with Zonisamide therapy who underwent Zonisamide treatment (25 mg/day) after the scanning of the first [11C]DPA713 positron emission tomography (PET) examination (4 men, 3 women; mean age ± SD, 70.9±7.7 years), and PD without Zonisamide therapy (2 men, 2 women; mean age ± SD, 63.3±1.9 years).

Regional [11C]DPA713 *BPND* derived from the region of interests (ROIs) were determined by using PMOD software. Paired *t*-tests were performed to compare the change in regional [11C]DPA713 *BPND* between the first and second PET datasets for the PD group (with and without Zonisamide) by using the SPSS. Statistical significance was set at p<0.05.

**Supplementary Results**

No significant differences were found between the PD groups treated with Zonisamide (disease duration 3.1±1.3 years, UPDRSⅢ 18.3±8.9, MMSE 26.0±2.2, RBMT 17.6±4.2, FAB 13.7±2.0, SDS 31.9±15.4) and one without Zonisamide (disease duration 3.0±3.4 years, UPDRSⅢ 15.8±5.9, MMSE 26.8±2.1, RBMT 15.0±4.5, FAB 11.8±3.6, SDS 34.5±8.0) at the first PET examination. Neither the PD with Zonisamide nor the PD without Zonisamide group showed significant changes in any clinical score between the first and second PET measurements.

In the ROI analysis, paired *t*-tests within each PD subgroup showed that levels of [11C]DPA *BPND* in various brain regions in the second measurement were significantly higher than those in the first measurement in the subgroup without Zonisamide, whereas no significant change was found in that with Zonisamide (Supplementary Table 2).
